# Supplementary material for: Low-temperature growth of idiomorphic cubic-phase Li7La3Zr2O12crystals using LiOH flux
Source: Royal Society of Chemistry journal article supplement (doi:10.1039/c5ce00386e), 2015-01-01
Supplement: c5ce00386e1.pdf [file c5ce00386e1.pdf]

## Supplementary Information

# Low-Temperature Growth of Idiomorphic Cubic-phase $\text{Li}_7\text{La}_3\text{Zr}_2\text{O}_{12}$ Crystals Using LiOH Flux

*Takeshi Kimijima,<sup>1</sup> Nobuyuki Zettsu,<sup>1,2,3</sup> Hitoshi Onodera,<sup>1</sup> Kunio Yubuta,<sup>3,4</sup> Shuji Oishi,<sup>1</sup> and Katsuya Teshima\*<sup>1,2,3</sup>*

<sup>1</sup>*Department of Environmental Science and Technology, Faculty of Engineering, Shinshu University, 4-17-1 Wakasato, Nagano 380-8553, Japan*

<sup>2</sup>*Center for Energy and Environmental Science, Shinshu University, 4-17-1 Wakasato, Nagano 380-8553, Japan*

<sup>3</sup>*JST-CREST 4-1-8, Honcho, Kawaguchi-shi, Saitama 332-0012, Japan*

<sup>4</sup>*Institute for Materials Research, Tohoku University, Sendai 980-8577, Japan*

Tel: +81-26-269-5556

Fax: +81-26-269-5550

E-mail address of corresponding author\*: [teshima@shinshu-u.ac.jp](mailto:teshima@shinshu-u.ac.jp)

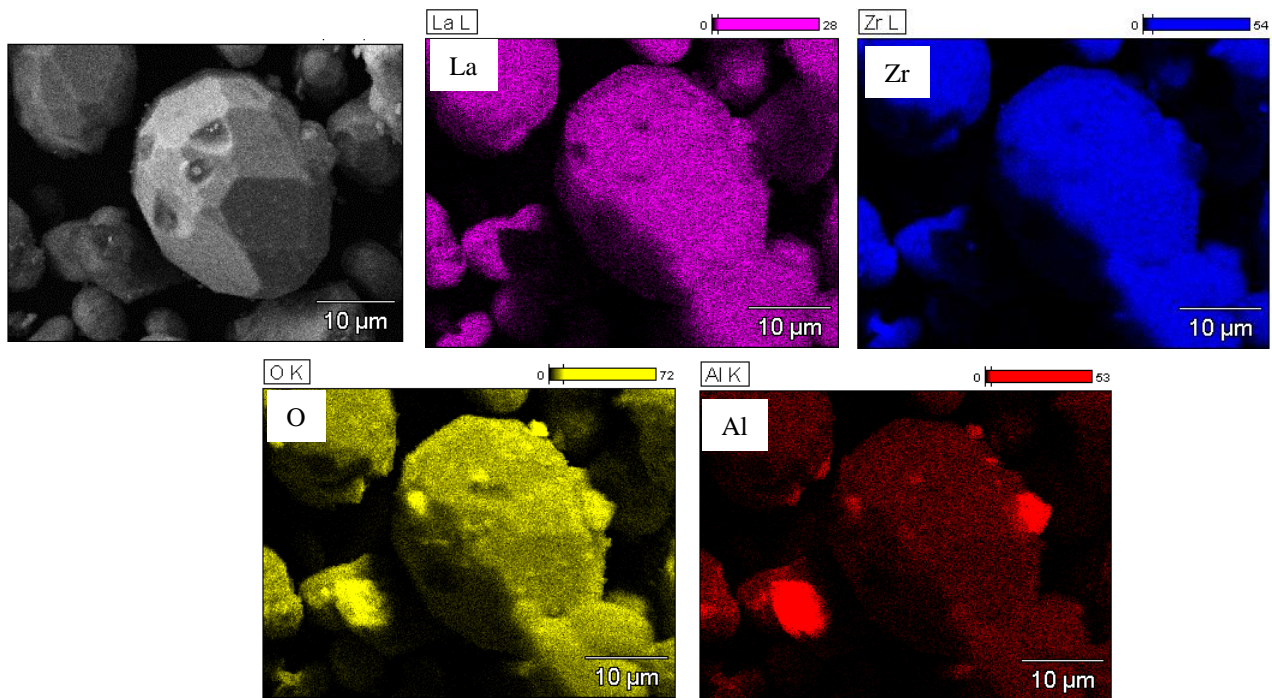

Figure S1 FE-SEM image and corresponding EDS mappings of the crystals grown at 900 °C with Li/Zr ratio of 70.

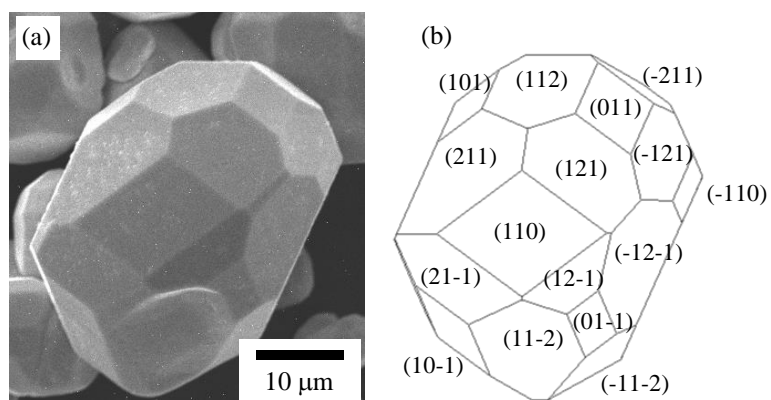

Figure S2 (a) High-magnification SEM image and (b) Schematic illustration of a LLZ crystal bounded by  $\{211\}$  and  $\{110\}$  facets. The illustration was drawn by using the crystal growth simulation software QuartzVS.
